# Supplementary material
Source: ML conference proceedings conference paper supplement (https://proceedings.neurips.cc/paper_files/paper/2017/hash/0e7c7d6c41c76b9ee6445ae01cc0181d-Abstract.html)
Supplement: Supplementary file [file 0e7c7d6c41c76b9ee6445ae01cc0181d-Supplemental.zip]

## A Supplementary Lemmas

In the following lemma, we highlight a property of nonsingular M-matrices, which we will use in the proof of Theorem 4.12

**Lemma A.1.** [19 Theorem 2] *A is a nonsingular M-matrix if and only if  $A^{-1}$  exists and  $A^{-1} \geq 0$ .*

We next introduce the following lemma, which is presented in various papers (e.g., [25 Lemma 4.12], [16 Corollary 1.2], [9 Theorem 1]) to analyze the spectral radii of nonnegative matrices.

**Lemma A.2.** *Let  $B_\alpha = e^\alpha L + e^{-\alpha} L^T$ , where  $L \geq 0$  is a strictly lower triangular matrix and  $\alpha \in \mathbb{R}$ . Then, either  $\rho(B_\alpha)$  is strictly log-convex in  $\alpha$  with  $\rho(B_\alpha) > \rho(B_0)$  for all  $\alpha \neq 0$  or  $\rho(B_\alpha)$  is constant for all  $\alpha \in \mathbb{R}$  (i.e.,  $B_\alpha$  is a consistently ordered matrix).*

*Proof.* Suppose the largest eigenvalue of  $B_\alpha$  has a multiplicity of 1. Then,

$$\rho(B_\alpha) = \lim_{t \rightarrow \infty} [\text{tr}((B_\alpha)^t)]^{1/t}. \quad (19)$$

In order to find the diagonal entries of  $(B_\alpha)^t$ , we consider the graph generated by the matrix  $B_\alpha$  and define the weight of a walk as the product of the weights of the corresponding edges in the walk. We then observe that the  $i$ th diagonal of the matrix  $(B_\alpha)^t$  can be written as the summation of weights of all closed walks of length  $t$  (from the  $i$ th node to itself). In particular, consider a valid closed walk  $w$  that contains edges  $(i_s, i_{s+1})_{s=0}^{t-1}$  such that  $i_0 = i_t = i$  and  $[B_\alpha]_{i_s, i_{s+1}} > 0$  for all  $s$ . Then, we can define a symmetric walk  $w'$  with edges  $(i_{s+1}, i_s)_{s=0}^{t-1}$  and the  $i$ th diagonal entry of  $(B_\alpha)^t$  contains the weights of both  $w$  and  $w'$  as summands. Furthermore, the weight of the walk  $w$  can be written as  $\phi_\alpha(w) = e^{c_w \alpha} \phi_0(w)$ , for some integer  $c_w$ , where

$$\phi_0(w) = \prod_{s=0}^{t-1} [B_0]_{i_s, i_{s+1}}.$$

The weight of the symmetric walk  $w'$  is then found by  $\phi_\alpha(w') = e^{-c_w \alpha} \phi_0(w)$  since  $B_0$  is symmetric. Therefore, the  $i$ th diagonal entry of  $(B_\alpha)^t$  can be found as follows

$$[(B_\alpha)^t]_{i,i} = \sum_{\text{all valid walks } w} \frac{e^{c_w \alpha} + e^{-c_w \alpha}}{2} \phi_0(w).$$

It is easy to observe that  $\cosh(c_w \alpha) = \frac{e^{c_w \alpha} + e^{-c_w \alpha}}{2}$  is a strictly log-convex function of  $\alpha$  for any  $c_w \neq 0$ . Thus, if there exists a walk  $w$  for which  $c_w \neq 0$ , then  $\text{tr}((B_\alpha)^t)$  is a strictly log-convex function of  $\alpha$  since  $\phi_0(w) > 0$  for all valid walks. On the other hand,  $\text{tr}((B_\alpha)^t)$  is constant in  $\alpha$  if and only if  $c_w = 0$  for all valid walks, which implies that the graph is bipartite since starting from an arbitrary node  $i$  it is not possible to return back to node  $i$  in odd number of steps. This together with [19] imply the statement of the lemma.

For the case the largest eigenvalue of  $B_\alpha$  has a multiplicity of at least 2, we consider the matrix  $\tilde{B}_\alpha(\epsilon) = B_\alpha + \epsilon I$ , whose largest eigenvalue has a multiplicity of 1 for any  $\epsilon > 0$ . Using the same arguments as above, we can conclude that the statement of the lemma holds for any  $\tilde{B}_\alpha(\epsilon)$  with  $\epsilon > 0$  and taking the limit as  $\epsilon \rightarrow 0^+$  concludes the proof of the lemma. ■

## B Proof of Lemma 4.3

By Assumption 4.1,  $\mu > 0$  and  $\text{tr}(A) = n$ , which implies all eigenvalues of the matrix  $A/n$  are in the interval  $(0, 1)$ . Therefore, we have

$$\rho(R) = \lambda_{\max} \left( \left( I - \frac{1}{n} A \right)^n \right) = \left( 1 - \frac{1}{n} \lambda_{\min}(A) \right)^n = \left( 1 - \frac{\mu}{n} \right)^n.$$

## C Proof of Theorem 4.7

The eigenvalues of  $C$  are the roots of the polynomial

$$\phi_C(\lambda) = \det(\lambda I - C) = 0.$$

As  $I - L$  is nonsingular and  $\det(I - L) = 1$ , we have

$$\begin{aligned}\phi_C(\lambda) &= \det(I - L) \det(\lambda I - C) \\ &= \det(\lambda I - \lambda L - L^T) \\ &= \sqrt{\lambda} \det \left( \sqrt{\lambda} I - \left( \sqrt{\lambda} L + \frac{1}{\sqrt{\lambda}} L^T \right) \right).\end{aligned}$$

Therefore, if  $\sqrt{\lambda}$  is an eigenvalue of the matrix  $\sqrt{\lambda} L + \frac{1}{\sqrt{\lambda}} L^T$ , then  $\lambda$  is an eigenvalue of  $C$ . Furthermore, since the eigenvalues of the matrix  $\sqrt{\lambda} L + \frac{1}{\sqrt{\lambda}} L^T$  are independent of  $\lambda$ , then  $\sqrt{\lambda}$  is an eigenvalue of  $L + L^T$  as well. Consequently, we have  $\rho(C) = \rho^2(L + L^T) = \rho^2(I - A) = (1 - \mu)^2$ .

#### D Proof of Theorem 4.12

Since  $A$  is an M-matrix,  $I - L$  is an M-matrix as well. Then by Lemma A.1,  $(I - L)^{-1} \geq 0$ , which implies  $C = (I - L)^{-1} L^T \geq 0$ . By the Perron-Frobenius Theorem, there exists a real eigenvalue of  $C$  denoted by  $\lambda$ , and the corresponding unit-norm eigenvector  $z \geq 0$  satisfying  $\lambda = \rho(C) \geq 0$  and

$$(\lambda L + L^T)z = \lambda z. \quad (20)$$

Therefore,  $\lambda$  is an eigenvalue of the matrix  $\lambda L + L^T$ . We then observe that  $\lambda L + L^T$  is an irreducible matrix as  $A$  is irreducible. Since the only nonnegative eigenvector of an irreducible nonnegative matrix is associated with the largest real eigenvalue of that matrix (by Perron-Frobenius Theorem), we conclude that

$$\lambda = \rho(\lambda L + L^T) = \sqrt{\lambda} \rho \left( \sqrt{\lambda} L + \frac{1}{\sqrt{\lambda}} L^T \right). \quad (21)$$

In order to obtain a lower bound on the right-hand side of (21), we use Lemma A.2, which characterizes the behavior of the spectral radius of the matrix in the right-hand side as  $\lambda$  varies (note that  $\lambda < 1$  since CCD converges linearly for  $\mu > 0$ , see, e.g. [18]). In particular, by Lemma A.2, we conclude that

$$\lambda \geq \sqrt{\lambda} \rho(L + L^T),$$

with equality if and only if  $A$  is a consistently ordered matrix. This yields

$$\rho(C) \geq \rho^2(L + L^T) = \rho^2(I - A) = (1 - \mu)^2 \quad (22)$$

with equality if and only if  $A$  is a consistently ordered matrix, which concludes the proof of the lower bound in (13). In order to obtain an upper bound on  $\rho(C)$ , we turn our attention back to (20) and multiply both sides by  $z^T$  from the left. This yields

$$\lambda z^T L z + z^T L^T z = \lambda,$$

since  $\|z\| = 1$ . Noting that  $z^T L z = z^T L^T z$  and defining  $\beta = z^T L z$ , we obtain

$$\lambda = \frac{\beta}{1 - \beta}. \quad (23)$$

Since  $\rho(L + L^T) = 1 - \mu$ , then for any  $\|y\| = 1$ , we have  $y^T(L + L^T)y \leq 1 - \mu$ . Picking  $y = z$  in this inequality yields  $2\beta \leq 1 - \mu$ , which together with (23) imply the upper bound in (13).

#### E Proof of Corollary 4.16

By Theorem 4.12, we have the following worst-case asymptotical rate bounds for the CCD algorithm

$$-\log(1 - \mu) + \log(1 + \mu) \leq \text{Rate}(\text{CCD}) \leq -2\log(1 - \mu).$$

Dividing both sides of the above inequality by  $-\log(1 - \mu)$ , we obtain

$$1 - \frac{\log(1 + \mu)}{\log(1 - \mu)} \leq \frac{\text{Rate}(\text{CCD})}{-\log(1 - \mu)} \leq 2.$$

Taking limit of both sides as  $\mu \rightarrow 0^+$  yields

$$\lim_{\mu \rightarrow 0^+} \frac{\text{Rate}(\text{CCD})}{-\log(1-\mu)} = 2. \quad (24)$$

By Lemma 4.3 we have the following worst-case asymptotical rate for the RCD algorithm

$$\text{Rate}(\text{RCD}) = -n \log \left( 1 - \frac{\mu}{n} \right).$$

Dividing both sides of the above inequality by  $-\log(1-\mu)$  and taking limit of both sides as  $\mu \rightarrow 0^+$ , we get

$$\lim_{\mu \rightarrow 0^+} \frac{\text{Rate}(\text{RCD})}{-\log(1-\mu)} = 1. \quad (25)$$

Combining (24) and (25) concludes the proof.

## F Example Achieving Lower and Upper Bounds

Consider solving the linear system  $Ax = 0$  where  $A$  is defined as follows

$$A = \begin{bmatrix} 1 & -\delta \\ -\delta & 1 \end{bmatrix}$$

for some  $\delta \in (0, 1)$ . The CCD algorithm applied to this problem has the following iteration matrix

$$C = \begin{bmatrix} 0 & \delta \\ 0 & \delta^2 \end{bmatrix},$$

whereas the expected RCD iteration matrix is

$$R = \left( I - \frac{A}{2} \right)^2 = \begin{bmatrix} 1/2 & \delta/2 \\ \delta/2 & 1/2 \end{bmatrix}^2 = \frac{1}{4} \begin{bmatrix} 1+\delta^2 & 2\delta \\ 2\delta & 1+\delta^2 \end{bmatrix}.$$

The eigendecomposition of this matrix can be found as follows

$$R = \begin{bmatrix} \frac{1}{\sqrt{2}} & -\frac{1}{\sqrt{2}} \\ \frac{1}{\sqrt{2}} & \frac{1}{\sqrt{2}} \end{bmatrix} \begin{bmatrix} \frac{1+\delta}{2} & 0 \\ 0 & \frac{1-\delta}{2} \end{bmatrix} \begin{bmatrix} \frac{1}{\sqrt{2}} & -\frac{1}{\sqrt{2}} \\ \frac{1}{\sqrt{2}} & \frac{1}{\sqrt{2}} \end{bmatrix}^{-1}.$$

Therefore, after  $\ell$  epochs the distance of the iterates generated by RCD starting from the initial point  $x^0 = [a, b]^T$  becomes

$$\begin{aligned} \mathbb{E} \|x^\ell - x^*\| &= \mathbb{E} \|x^\ell\| \geq \|\mathbb{E} x^\ell\| = \|R^\ell x^0\| = \left\| \begin{bmatrix} \left(\frac{1+\delta}{2}\right)^\ell a \\ \left(\frac{1-\delta}{2}\right)^\ell b \end{bmatrix} \right\| \\ &= \sqrt{\left(\frac{1+\delta}{2}\right)^{2\ell} a^2 + \left(\frac{1-\delta}{2}\right)^{2\ell} b^2} \\ &\geq \left(\frac{1+\delta}{2}\right)^\ell |a| \\ &\geq \delta^\ell |a|. \end{aligned}$$

Therefore, in order to achieve a solution in the  $\epsilon$ -neighborhood of the optimal solution  $x^* = 0$ , i.e., to attain  $\|x^\ell - x^*\| = \epsilon$ , the RCD method requires

$$N_R(\epsilon) \geq \frac{\log \epsilon}{\log \delta} - \frac{\log |a|}{\log \delta}$$

epochs, for any  $a \neq 0$ .

On the other hand, for the CCD algorithm, we have

$$C^\ell = \begin{bmatrix} 0 & \delta^{2\ell-1} \\ 0 & \delta^{2\ell} \end{bmatrix},$$

and consequently the suboptimality of the iterates generated by the CCD algorithm is

$$\|C^\ell x_0\| = \delta^{2\ell} \sqrt{b^2 + \frac{1}{\delta^2} b^2}.$$

Therefore, in order to achieve a solution in the  $\epsilon$ -neighborhood of the optimal solution  $x^* = 0$ , i.e., to attain  $\|x^\ell - x^*\| = \epsilon$ , the CCD method requires

$$N_C(\epsilon) = \frac{\log \epsilon}{2 \log \delta} - \frac{\log(b^2 + \frac{1}{\delta^2} b^2)}{4 \log \delta}$$

epochs.

Note that for small  $\epsilon$  the first terms in the expression of  $N_J(\epsilon)$  and  $N_C(\epsilon)$  are dominant. In particular we have,

$$\lim_{\epsilon \rightarrow 0^+} \frac{N_R(\epsilon)}{N_C(\epsilon)} \geq \frac{2 \log \delta}{\log \delta} = 2, \quad (26)$$

for any  $a \neq 0$ .
